# Supplementary material
Source: publisher figshare collection journal article supplement (https://acs.figshare.com/ndownloader/files/27661710)
Supplement: Supplementary file 1 [file 27661710]

**Supporting Information for**

**Flowing-air Induced Transformation to Promote the Dispersion of**

**CrO<sub>x</sub> Catalyst for Propane Dehydrogenation**

Zhewei Zhang <sup>1,†//⊥</sup>, Dedong He <sup>1,‡//⊥</sup>, Zijun Huang <sup>†//⊥</sup>, Sufang He <sup>§//⊥</sup>, Jichang Lu <sup>\*,†//⊥</sup>, Yongming Luo <sup>\*,†//⊥</sup>

<sup>†</sup> Faculty of Environmental Science and Engineering, Kunming University of Science and Technology, Kunming 650500, P. R. China;

<sup>‡</sup> Faculty of Chemical Engineering, Kunming University of Science and Technology, Kunming 650500, P. R. China;

<sup>§</sup> Research Center for Analysis and Measurement, Kunming University of Science and Technology, Kunming 650093, P. R. China;

<sup>//</sup> Kunming University of Science and Technology Innovation Team of the Ministry of Volatile Organic Compound Pollution Prevention and Resource Reuse, Kunming 650500, P. R. China;

<sup>⊥</sup> Key Laboratory of Odor Volatile Organic Compounds Control in Universities of Yunnan Province, Kunming 650500, P. R. China;

<sup>1</sup> These authors contributed equally to this work

\* Corresponding author

Tel: +86-871-65103845

Fax: +86-871-65103845

E-mail: [environcatalysis@kust.edu.cn](mailto:environcatalysis@kust.edu.cn)

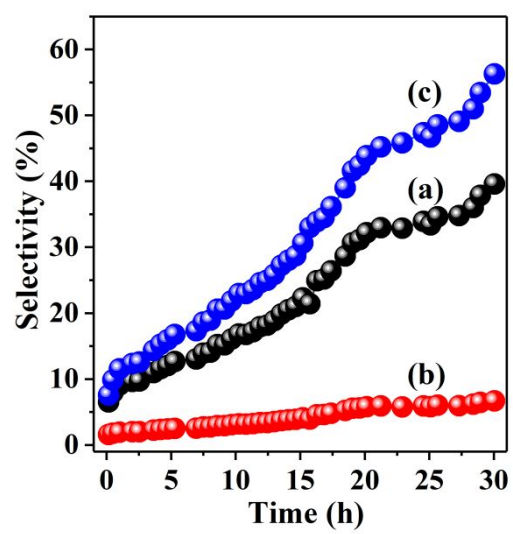

**Figure S1.** Time on-stream selectivity of methane (a) ethane(b) and ethylene(c) over Cr/MCM-TC catalysts.

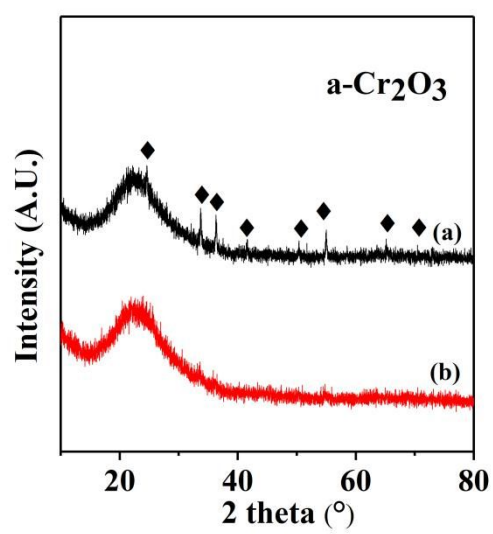

**Figure S2.** XRD patterns: (a) 5Cr/MCM-TC, (b) 5Cr/MCM-FC

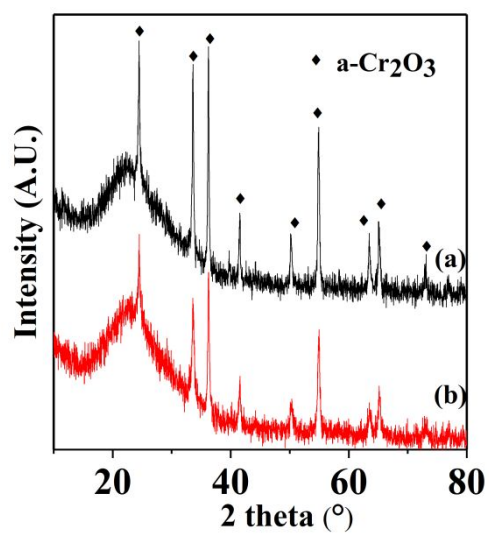

**Figure. S3.** XRD powder patterns of (a) 20Cr/MCM41-TC and (b) 20Cr/MCM41-FC.

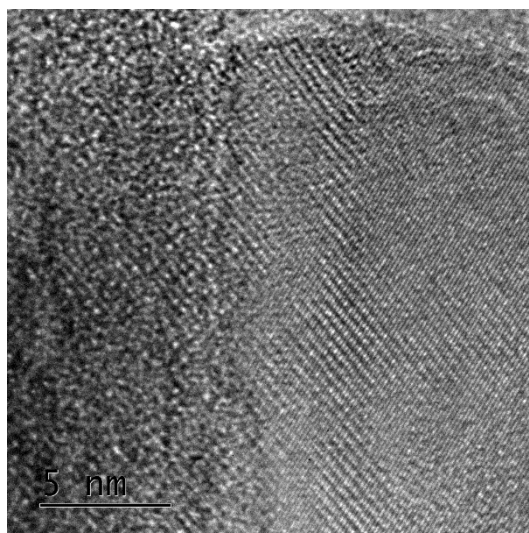

**Figure. S4.** HRTEM of Cr/MCM-FC.

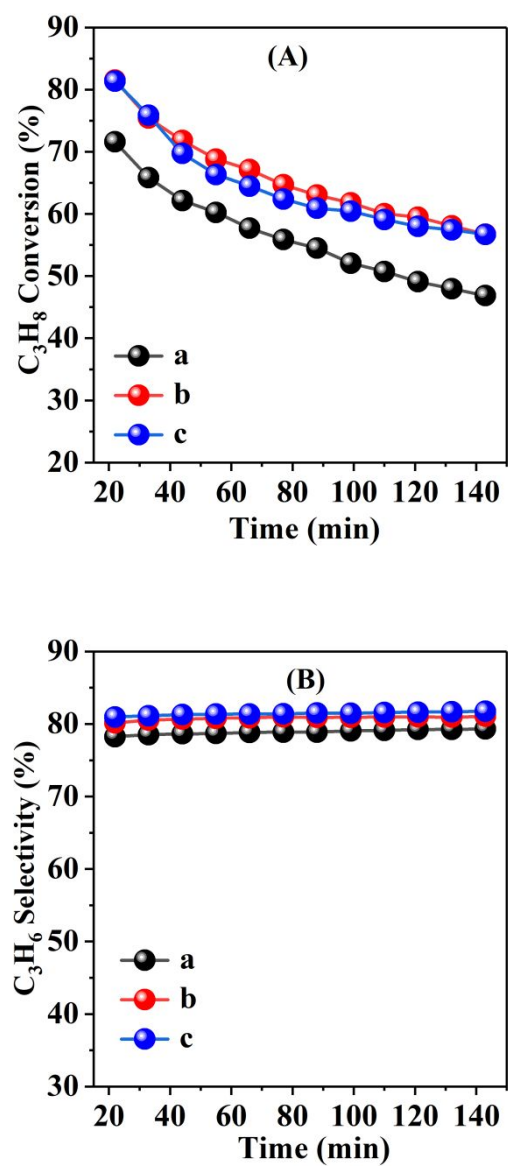

**Figure S5.** Time on-stream for propane conversion (A) and selectivity (B). (a) 5ml/min, (b) 15ml/min, (c) 30ml/min.

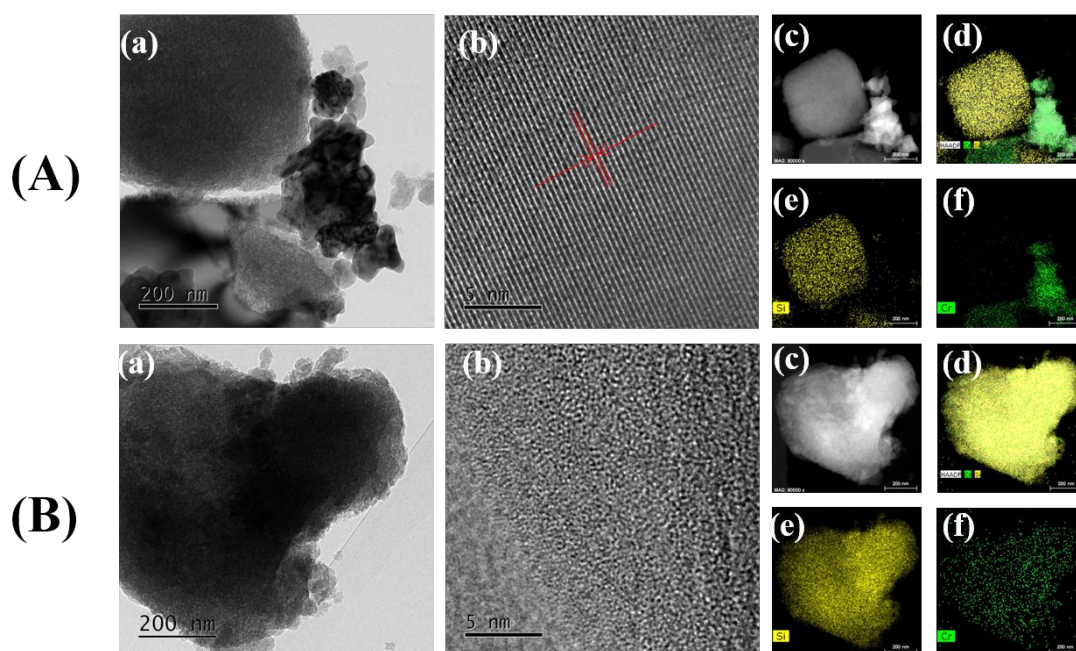

**Figure S6.** (a) TEM, (b) HRTEM and (c, d, e, f) EDS elemental mapping images of  $(\text{H}_8\text{CrN}_2\text{O}_4)$  Cr/MCM-TC (A) and  $(\text{H}_8\text{CrN}_2\text{O}_4)$  Cr/MCM-FC (B).



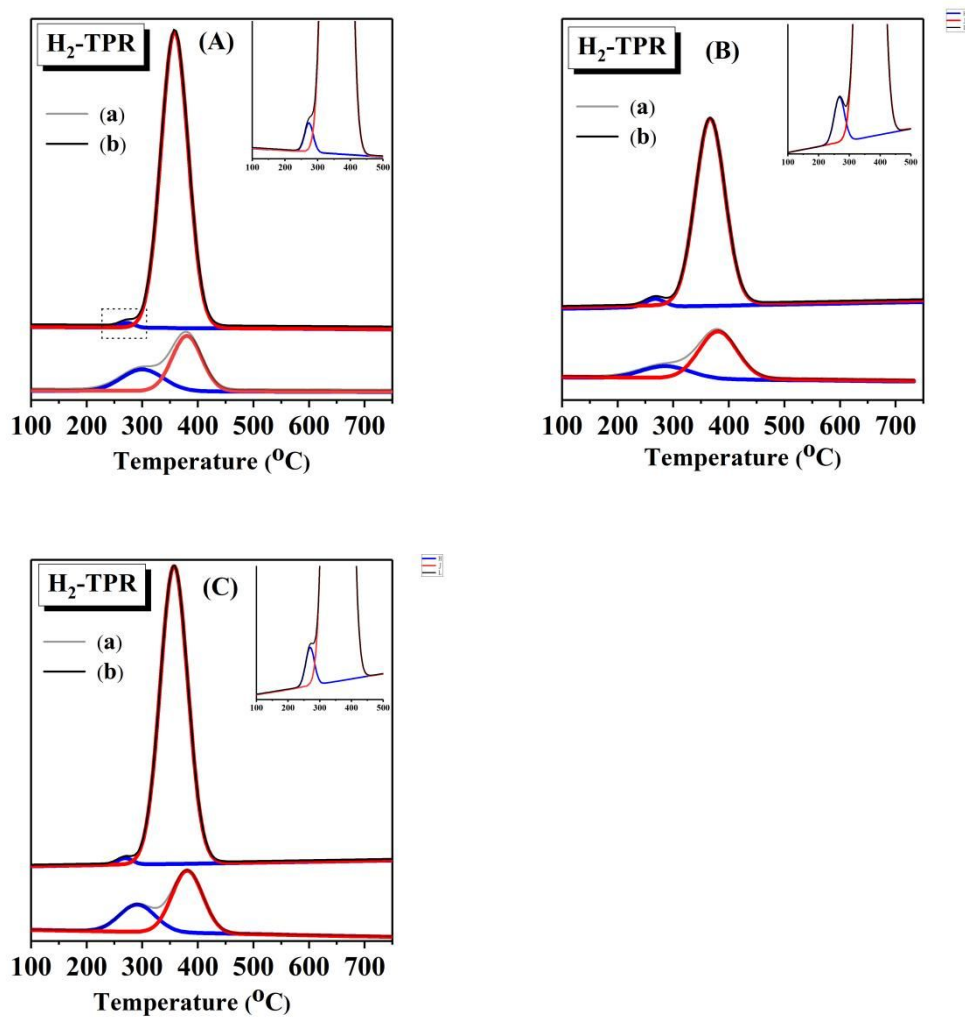

**Figure S7.** H<sub>2</sub>-TPR profiles of (H<sub>8</sub>CrN<sub>2</sub>O<sub>4</sub>) Cr/MCM catalysts (A) , (CrO<sub>4</sub><sup>2-</sup>) Cr/SBA catalysts (B) and (H<sub>8</sub>CrN<sub>2</sub>O<sub>4</sub>) Cr/SBA catalysts (C) with two roasting methods: (a) Cr/X-TC, (b) Cr/X-FC.

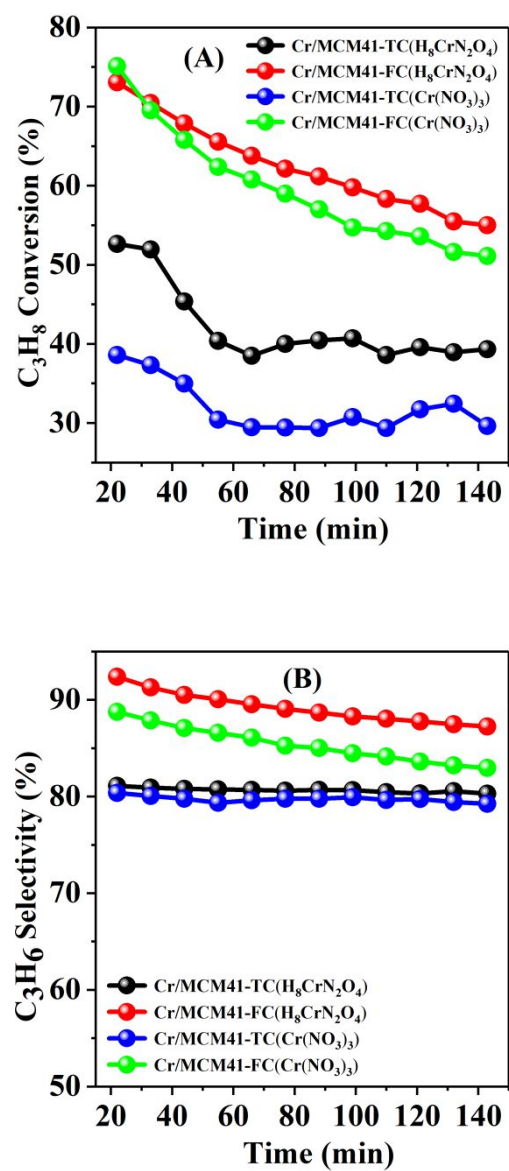

**Figure S8.** Time on-stream for propane conversion (A) and selectivity (B) over Cr/MCM catalysts with different precursors.

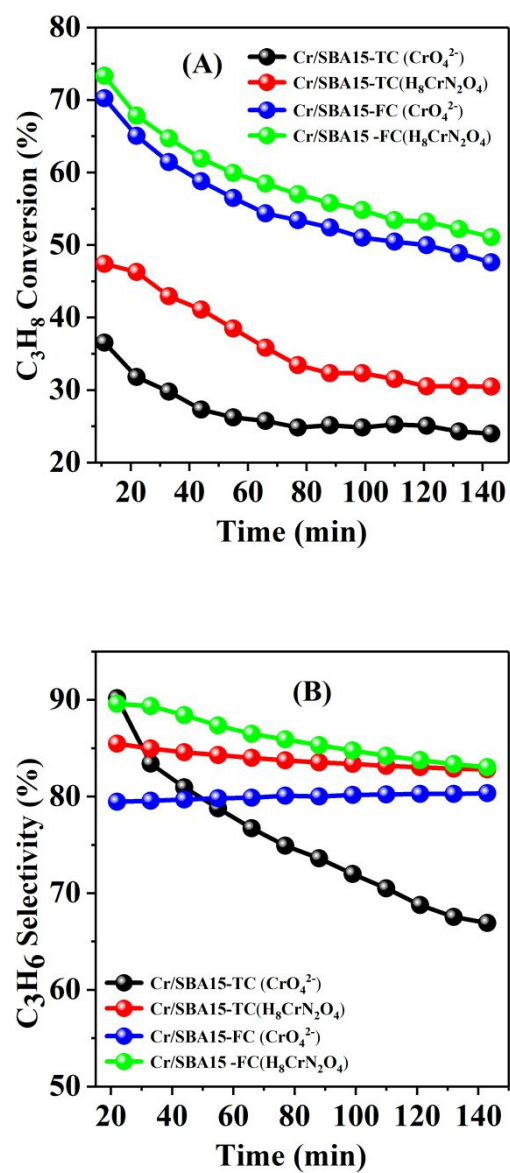

**Figure S9.** Time on-stream for propane conversion (A) and selectivity (B) over Cr/SBA catalysts with different precursors.

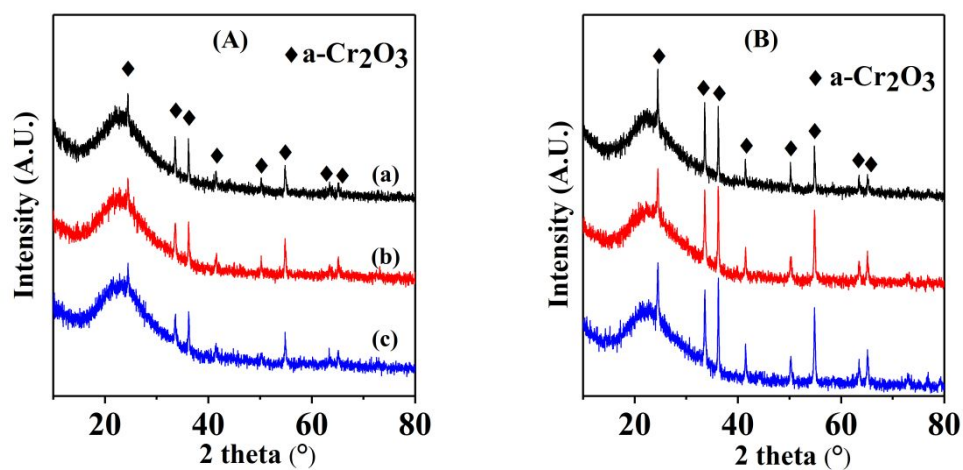

**Figure S10** XRD powder patterns of spent Cr/MCM41-FC (A) and Cr/MCM41-TC (B). (a) Fresh samples, (b) reacted for 3h, (c) reacted for 30h.

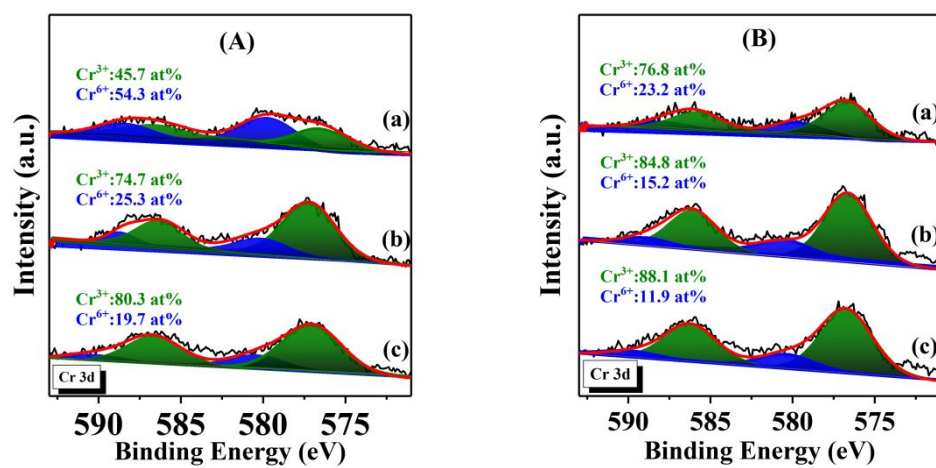

**Figure S11** XPS spectra of Cr 2p for spent Cr/MCM41-FC (A) and Cr/MCM41-TC (B). (a) Fresh samples, (b) reacted for 3h, (c) reacted for 30h.

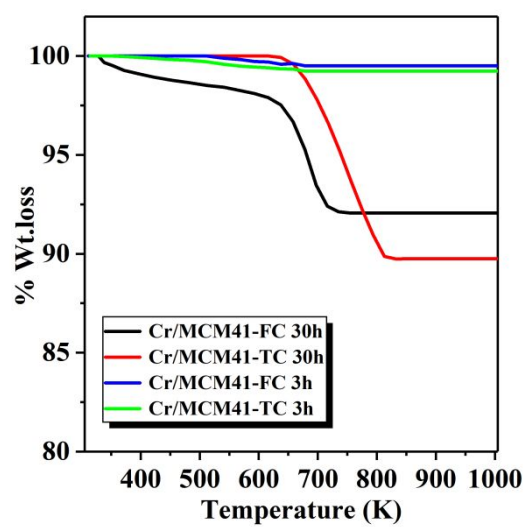

**Figure S12** TG of different spent Cr/MCM-41 catalysts. %Wt. loss represent the weight-normalized mass loss.

**Table S1** Content of Cr elements in Cr/MCM catalysts prepared by two calcination methods

| Catalysts                                    | The content of Cr elements (%). |
|----------------------------------------------|---------------------------------|
| (CrO <sub>4</sub> <sup>2-</sup> )Cr/MCM41-FC | 7.74                            |
| (CrO <sub>4</sub> <sup>2-</sup> )Cr/MCM41-TC | 8.04                            |

**Table S2** Parameters obtained from EXAFS analysis for the Cr/MCM catalysts with two roasting methods.

|           | shell | CN      | R(Å)      | $\sigma^2$ | $\Delta E_0$ | R factor |
|-----------|-------|---------|-----------|------------|--------------|----------|
| Cr/MCM-TC | Cr-O1 | 4.9±0.3 | 2.26±0.01 | 0.0030     | 6.7          | 0.0035   |
|           | Cr-O2 | 4.0±0.6 | 3.18±0.01 |            |              |          |
| Cr/MCM-FC | Cr-O1 | 2.7±0.6 | 1.70±0.01 | 0.0034     | 7.8          | 0.0124   |
|           | Cr-O2 | 4.2±0.6 | 2.01±0.03 |            |              |          |



**Table S3** Catalytic performance of all catalysts covered in the paper. ( $t_0$  and  $t_{2.5}$  are the initial reaction and reaction 2.5h, respectively, GHSV=4200,  $C_3H_8=5$ ,  $N_2=30$ )

| Catalysts                        | Reaction<br>temp( $^{\circ}C$ ) | Conversion (%) |           | Selectivity(%) |           |
|----------------------------------|---------------------------------|----------------|-----------|----------------|-----------|
|                                  |                                 | $t_0$          | $t_{2.5}$ | $t_0$          | $t_{2.5}$ |
| ( $CrO_4^{2-}$ )Cr/MC<br>M41-TC  | 600                             | 30             | 16        | 78             | 73        |
| ( $CrO_4^{2-}$ )Cr/MC<br>M41-FC  | 600                             | 87.7           | 55        | 81.1           | 83        |
| ( $H_8CrN_2O_4$ )Cr/<br>MCM41-TC | 600                             | 52.6           | 39        | 81             | 80        |
| ( $H_8CrN_2O_4$ )Cr/<br>MCM41-FC | 600                             | 73             | 55        | 92             | 87        |
| ( $Cr(NO_3)_3$ )Cr/M<br>CM41-TC  | 600                             | 38.5           | 29        | 80             | 79        |
| ( $Cr(NO_3)_3$ )Cr/M<br>CM41-FC  | 600                             | 75             | 51        | 88             | 82        |
| ( $CrO_4^{2-}$ )Cr/SBA<br>15-TC  | 600                             | 36             | 24        | 83             | 66        |
| ( $CrO_4^{2-}$ )Cr/SBA<br>15-FC  | 600                             | 70             | 47        | 79             | 80        |
| ( $H_8CrN_2O_4$ )Cr/<br>SBA15-TC | 600                             | 47             | 30        | 85             | 82        |

|                                                                  |     |    |    |    |    |
|------------------------------------------------------------------|-----|----|----|----|----|
| (H <sub>8</sub> CrN <sub>2</sub> O <sub>4</sub> )Cr/<br>SBA15-FC | 600 | 73 | 51 | 89 | 83 |
|------------------------------------------------------------------|-----|----|----|----|----|

---

**Table S4 Quantitative data of H<sub>2</sub> consumption for all samples.**

| Catalysts                                                     | The H <sub>2</sub> Consumption of<br>monomeric Cr(VI) (mmol/g) |
|---------------------------------------------------------------|----------------------------------------------------------------|
| (CrO <sub>4</sub> <sup>2-</sup> )Cr/MCM41-TC                  | 0.2                                                            |
| (CrO <sub>4</sub> <sup>2-</sup> )Cr/MCM41-FC                  | 1.21                                                           |
| (H <sub>8</sub> CrN <sub>2</sub> O <sub>4</sub> )Cr/MCM41-TC  | 0.39                                                           |
| (H <sub>8</sub> CrN <sub>2</sub> O <sub>4</sub> )Cr/MCM41-FC  | 1.83                                                           |
| (CrO <sub>4</sub> <sup>2-</sup> )Cr/SBA15-TC                  | 0.36                                                           |
| (CrO <sub>4</sub> <sup>2-</sup> )Cr/SBA15-FC                  | 1.57                                                           |
| (H <sub>8</sub> CrN <sub>2</sub> O <sub>4</sub> )Cr/ SBA15-TC | 0.42                                                           |
| (H <sub>8</sub> CrN <sub>2</sub> O <sub>4</sub> )Cr/ SBA15-FC | 1.91                                                           |
